# Supplementary material
Source: MDPI journal article supplement (https://www.mdpi.com/2075-4701/11/5/833)
Supplement: s1 [file s1]

```
# -*- coding: utf-8 -*-
```

```
"""
```

```
@author: Net Shape Manufacturing LABoratory
```

```
Sogang University
```

```
Seoul, South Korea
```

```
Refer to "https://www.kaggle.com/serigne/stacked-regressions-top-4-on-leaderboard/notebook" by  
Serigne;
```

```
"""
```

```
import matplotlib.pyplot as plt
```

```
import numpy as np
```

```
import pandas as pd
```

```
pd.set_option('display.float_format', lambda x: '%.3f' % x) #Limiting floats output to 3 decimal points
```

```
import seaborn as sns
```

```
import warnings
```

```
def ignore_warn(*args, **kwargs):
```

```
    pass
```

```
warnings.warn = ignore_warn
```

```
from scipy.stats import norm, skew
```

```
from scipy.special import boxcox1p
```

```
from sklearn.metrics import r2_score
```

```
from sklearn.externals import joblib
```

```
from sklearn.pipeline import make_pipeline
```

```
from sklearn.preprocessing import MaxAbsScaler
```

```
from sklearn.ensemble import GradientBoostingRegressor
```

```
#####
```

```

def model_learning():

    print('-'*40)

    print('Train a model for force integral')

    print('-'*40)

    # input data

    column_names = ['D0','d0','s0','h0','DF','dF','sF','hF','T','Vs','vmM','YS','YM','ENE']

    # read excel file by using pandas module

    rawdata = pd.read_excel('./Database_ALL.xlsx', sheet_name='db global',

                             names = column_names, skipinitialspace=True)

    dataset = rawdata.copy()

    # normally distribution

    dataset['ENE'] = np.log1p(dataset['ENE']) # log1p = log(1+x)

    sns.distplot(dataset['ENE'], fit = norm)

    (mu, sigma) = norm.fit(dataset['ENE'])

    # Skewed features

    numeric_feats = dataset.dtypes[dataset.dtypes != "object"].index

    skewed_feats=dataset[numeric_feats].apply(lambda
x:skew(x.dropna()))).sort_values(ascending=False)

    print('Skew in numerical features:')

    skewness = pd.DataFrame({'Skew' : skewed_feats})

    print(skewness)

```

```
skewness = skewness[abs(skewness) > 0.750]
```

```
skewness = skewness.dropna()
```

```
skewed_features = skewness.index
```

```
lamd = 0.15
```

```
for feat in skewed_features:
```

```
    dataset[feat] = boxcox1p(dataset[feat], lamd) # (  $x^{\text{lamd}} - 1$  ) / lamd
```

```
# split the training dataset
```

```
train_dataset = dataset.sample(frac=0.8,random_state=0)
```

```
test_dataset = dataset.drop(train_dataset.index)
```

```
train_labels = train_dataset.pop('ENE')
```

```
test_labels = test_dataset.pop('ENE')
```

```
# model import
```

```
print('model loading!')
```

```
# hyperparameters are tuned by using random searching method
```

```
GBoost = make_pipeline(MaxAbsScaler(), GradientBoostingRegressor(n_estimators=6902,  
learning_rate=0.091, max_depth=2, max_features='sqrt', min_samples_leaf=15,  
min_samples_split=11, loss='huber', random_state =5))
```

```
# learn the model
```

```
print('model learning!')
```

```
GBoost.fit(train_dataset,train_labels)
```

```

# applicate to the test dataset

# return the ENE value from log scale (np.log1p)

test_labels_G = np.expm1(test_labels.values)

GBoost_pred = np.expm1(GBoost.predict(test_dataset))


# write the data in " ML_results.txt "

f = open('./ML_results.txt','w')


f.write('test_label\n')

for i in range(len(test_labels_G)):

    f.write(str(test_labels_G[i]))

    f.write('\n')


f.write('GBoost_pred\n')

for i in range(len(GBoost_pred)):

    f.write(str(GBoost_pred[i]))

    f.write('\n')


f.write('percenterror\n')

diff = GBoost_pred - test_labels_G

abspercentDiff = np.abs((diff/test_labels_G)*100)

for i in range(len(abspercentDiff)):

    f.write(str(abspercentDiff[i]))

    f.write('\n')

f.close()

```

```
# plot the prediction results for the test cases

plt.scatter(test_labels_G, GBoost_pred, label='Gradient Boosting')

plt.xlabel('True Values')

plt.ylabel('Predictions')

plt.axis('equal')

plt.axis('square')

plt.xlim([0,plt.xlim()[1]])

plt.ylim([0,plt.ylim()[1]])

_ = plt.plot([0, 150000], [0, 150000])

plt.show()
```

```
# save the learning model

joblib.dump(GBoost, './model.joblib')

print('save done!')
```

```
#####
```

```
def predict():
```

```
    print('-'*40)
```

```
    print('Predict an Energy consumption')
```

```
    print('-'*40)
```

```
    '''
```

```
    input values   : D0, d0, s0, h0 / Df, df, sf, hf / T / Vs / vmM / YS / YM
```

```
    output value   : ENE
```

```
    '''
```

```
    # load the model
```

```
    print('load the model')
```

```
    GBoost_model = joblib.load('./model.joblib')
```

```
    print('Input the parameters!')
```

```
    # enter the values
```

```
    D0 = float(input(" D0 value : ")); d0_ = float(input(" d0 value : "));
```

```
    s0 = float(input(" s0 value : ")); h0 = float(input(" h0 value : "));
```

```
    DF = float(input(" DF value : ")); dF_ = float(input(" dF value : "));
```

```
    sF = float(input(" sF value : ")); hF = float(input(" hF value : "));
```

```
    T = float(input(" T value : ")); Vs = float(input(" Vs value : "))
```

```
    vmM = float(input(" vmM value : ")); YS = float(input(" YS value : "));
```

```
    YM = float(input(" YM value : "))
```

```

# make pandas dataframe from a dictionary variable

lamd = 0.15

input_dict = {'D0':[boxcox1p(D0,lamd)], 'd0':[boxcox1p(d0_,lamd)], 's0':[s0],
'h0':[boxcox1p(h0,lamd)],

               'DF':[boxcox1p(DF,lamd)], 'dF':[boxcox1p(dF_,lamd)], 'sF':[sF],
'hF':[boxcox1p(hF,lamd)],

               'T':[T], 'Vs':[Vs], 'vmM':[boxcox1p(vmM,lamd)], 'YS':[YS], 'YM':[YM]}

dataset = pd.DataFrame(input_dict)

# predict the ENE

ENE = GBoost_model.predict(dataset)

ENE = np.expm1(ENE)

print('The energy efficiency : %f' %(ENE))

#####

if __name__ == "__main__":

    model_learning()

    predict()

```
